# Supplementary material for: Metabolic Adaptation of Methanogens in Anaerobic Digesters Upon Trace Element Limitation
Source: Front Microbiol. 2018 Mar 13;9:405. doi: 10.3389/fmicb.2018.00405 (PMC5859356; doi:10.3389/fmicb.2018.00405)
Supplement: Supplementary file 3 [file DataSheet3.xlsx]

## Sheet: Methanogenic proteins
Ratio of proteins assigned to methanogens (Methanomicrobiaceae and Methanosarcinaceae) and total proteins. The remaining proteins were assigned to Bacteria and other Euryarchaeota.
Reactor R1
Sample	1	2	3	4	5	6	7	8	9	10	Mean	SD	Median
Week 65	0.35657	0.317415	0.303987	0.297332	0.342767	0.325111	0.338146	0.33899	0.334703	0.315519	0.327054	0.0175708	0.329907
Week 77	0.354771	0.271206	0.261306	0.304291							0.297893	0.0364925	0.287748
Week 80	0.380292	0.392683	0.378684	0.403907							0.388891	0.0102224	0.386487
Week 84	0.367297	0.321404	0.3338	0.350242							0.343186	0.0172748	0.342021
Reactor R2
Sample	1	2	3	4	5	6	7	8	9	10	Mean	SD	Median
Week 65	0.375748	0.343663	0.331685	0.392233	0.37005	0.422119	0.433302	0.322926	0.417977	0.364629	0.377433	0.036615	0.372899
Week 77	0.411585	0.4185	0.362493	0.357183	0.420733	0.360863	0.450437	0.37438	0.385284	0.353668	0.389513	0.0318461	0.379832
Week 80	0.431286	0.464287	0.452724	0.463037	0.431414	0.491903	0.491998	0.446926	0.453348	0.430973	0.45579	0.0215506	0.453036
Week 84	0.394853	0.411436	0.42163	0.468903	0.485659	0.502509	0.334282	0.406828	0.400014	0.433537	0.425965	0.0468687	0.416533

## Sheet: R1 Methanomicrobiaceae
	Raw							Normalized
Sample	EC	Enzyme	Mean	STD	Median		Sample	EC	Enzyme	Mean	STD	Median
Week 65	EC 1.2.99.5	Formyl-Methanofuran Dehydrogenase	0.000957021	0.000429701	0.00103627		Week 65	EC 1.2.99.5	Formyl-Methanofuran Dehydrogenase	0.294829	0.131973	0.340892
	EC 2.3.1.101	Formylmethanofuran:H4MPT Formyltransferase	0.00128218	0.00068639	0.00111192			EC 2.3.1.101	Formylmethanofuran:H4MPT Formyltransferase	0.389723	0.210801	0.332116
	EC 3.5.4.27	Methenyl-H4MPT Cyclohydrolase	0.000919698	0.000367934	0.000937575			EC 3.5.4.27	Methenyl-H4MPT Cyclohydrolase
	EC 1.12.98.2	Methylene-H4MPT Dehydrogenase	0.000864926	0.000302505	0.000830187			EC 1.12.98.2	Methylene-H4MPT Dehydrogenase	0.265349	0.0924526	0.263958
	EC 1.5.98.2	Methylene-H4MPT Reductase	0.00365957	0.00147587	0.00397064			EC 1.5.98.2	Methylene-H4MPT Reductase	1.1058	0.42181	1.16448
	EC 2.1.1.86	Methyl-H4MPT:CoM Methyltransferase	0.00305819	0.00152293	0.00269473			EC 2.1.1.86	Methyl-H4MPT:CoM Methyltransferase	0.944368	0.488044	0.785475
	EC 2.8.4.1	Methyl-CoM Reductase	0.00891658	0.00375521	0.00834891			EC 2.8.4.1	Methyl-CoM Reductase	2.68529	1.03832	2.57244
	1.8.98.1	Heterodisulfide reductase	0.00297197	0.00101602	0.00304773			1.8.98.1	Heterodisulfide reductase	0.92039	0.329165	0.9516
	1.12.98.1	Coenzyme F420-reducing hydrogenasegeneric	0.00169361	0.000709865	0.0015675			1.12.98.1	Coenzyme F420-reducing hydrogenasegeneric	0.51757	0.217774	0.490011
Week 77	EC 1.2.99.5	Formyl-Methanofuran Dehydrogenase	0.00111315	0.000281603	0.00108314		Week 77	EC 1.2.99.5	Formyl-Methanofuran Dehydrogenase	0.369963	0.0632754	0.37838
	EC 2.3.1.101	Formylmethanofuran:H4MPT Formyltransferase						EC 2.3.1.101	Formylmethanofuran:H4MPT Formyltransferase
	EC 3.5.4.27	Methenyl-H4MPT Cyclohydrolase						EC 3.5.4.27	Methenyl-H4MPT Cyclohydrolase
	EC 1.12.98.2	Methylene-H4MPT Dehydrogenase	0.00111315	0.000281603	0.00108314			EC 1.12.98.2	Methylene-H4MPT Dehydrogenase	0.369963	0.0632754	0.37838
	EC 1.5.98.2	Methylene-H4MPT Reductase	0.000263992	0.000335742	0.00011731			EC 1.5.98.2	Methylene-H4MPT Reductase	0.160651	0.0708636	0.160651
	EC 2.1.1.86	Methyl-H4MPT:CoM Methyltransferase	0.00489402	0.00114432	0.00508164			EC 2.1.1.86	Methyl-H4MPT:CoM Methyltransferase	1.69234	0.48977	1.84856
	EC 2.8.4.1	Methyl-CoM Reductase	0.0124747	0.0044778	0.0103257			EC 2.8.4.1	Methyl-CoM Reductase	4.09557	0.957276	3.73962
	1.8.98.1	Heterodisulfide reductase	0.00245794	0.000807373	0.00255154			1.8.98.1	Heterodisulfide reductase	0.838008	0.301896	0.848595
	1.12.98.1	Coenzyme F420-reducing hydrogenasegeneric	0.00281095	0.000784641	0.00274144			1.12.98.1	Coenzyme F420-reducing hydrogenasegeneric	0.938626	0.224101	0.894008
Week 80	EC 1.2.99.5	Formyl-Methanofuran Dehydrogenase	0.0017269	0.00105412	0.00167695		Week 80	EC 1.2.99.5	Formyl-Methanofuran Dehydrogenase	0.446052	0.278781	0.423109
	EC 2.3.1.101	Formylmethanofuran:H4MPT Formyltransferase						EC 2.3.1.101	Formylmethanofuran:H4MPT Formyltransferase
	EC 3.5.4.27	Methenyl-H4MPT Cyclohydrolase	0.000526875	0.000395405	0.00031665			EC 3.5.4.27	Methenyl-H4MPT Cyclohydrolase	0.136996	0.10497	0.0821951
	EC 1.12.98.2	Methylene-H4MPT Dehydrogenase	0.0052205	0.00263442	0.0055647			EC 1.12.98.2	Methylene-H4MPT Dehydrogenase	1.66436	0.330142	1.55663
	EC 1.5.98.2	Methylene-H4MPT Reductase	0.00389787	0.000468672	0.00411801			EC 1.5.98.2	Methylene-H4MPT Reductase	1.00091	0.10717	1.05185
	EC 2.1.1.86	Methyl-H4MPT:CoM Methyltransferase	0.00464797	0.0015583	0.00426932			EC 2.1.1.86	Methyl-H4MPT:CoM Methyltransferase	1.18561	0.365252	1.10164
	EC 2.8.4.1	Methyl-CoM Reductase	0.0109338	0.00242005	0.0118896			EC 2.8.4.1	Methyl-CoM Reductase	2.80663	0.60497	2.98226
	1.8.98.1	Heterodisulfide reductase	0.00340999	0.00101274	0.0034867			1.8.98.1	Heterodisulfide reductase	0.876324	0.262125	0.873549
	1.12.98.1	Coenzyme F420 hydrogenase	0.00321462	0.000958826	0.00335142			1.12.98.1	Coenzyme F420 hydrogenase	0.826509	0.251134	0.841221
Week 84	EC 1.2.99.5	Formyl-Methanofuran Dehydrogenase	0.00111613	0.000465811	0.00266297		Week 84	EC 1.2.99.5	Formyl-Methanofuran Dehydrogenase	0.636632	0.267196	0.822577
	EC 2.3.1.101	Formylmethanofuran:H4MPT Formyltransferase						EC 2.3.1.101	Formylmethanofuran:H4MPT Formyltransferase
	EC 3.5.4.27	Methenyl-H4MPT Cyclohydrolase						EC 3.5.4.27	Methenyl-H4MPT Cyclohydrolase
	EC 1.12.98.2	Methylene-H4MPT Dehydrogenase	0.00632333	0.00120852	0.00575854			EC 1.12.98.2	Methylene-H4MPT Dehydrogenase	1.8769	0.29165	1.72515
	EC 1.5.98.2	Methylene-H4MPT Reductase	0.00534535	0.00288501	0.00277809			EC 1.5.98.2	Methylene-H4MPT Reductase	0.831678	0.367957	0.845641
	EC 2.1.1.86	Methyl-H4MPT:CoM Methyltransferase	0.00526	0.00250428	0.00673231			EC 2.1.1.86	Methyl-H4MPT:CoM Methyltransferase	1.9727	0.490223	2.05113
	EC 2.8.4.1	Methyl-CoM Reductase	0.0150383	0.00551417	0.00762358			EC 2.8.4.1	Methyl-CoM Reductase	2.31006	0.465985	2.32792
	1.8.98.1	Heterodisulfide reductase	0.0010892	0.000421702	0.00139298			1.8.98.1	Heterodisulfide reductase	0.466055	0.23897	0.407879
	1.12.98.1	Coenzyme F420-reducing hydrogenasegeneric	0.00331519	0.00160146	0.00726927			1.12.98.1	Coenzyme F420-reducing hydrogenasegeneric	2.06588	0.304539	2.16729

## Sheet: R1 Methanosarcinaceae
	Raw							Normalized
Sample	EC	Enzyme	Mean	STD	Median		Sample	EC	Enzyme	Mean	STD	Median
Week 65	EC 2.7.2.1	Acetate Kinase	0.000646004	0.000342194	0.000517359		Week 65	EC 2.7.2.1	Acetate Kinase	0.198746	0.108243	0.1489
	EC 2.1.1.245	Acetyl-CoA decarboxylase/synthase complex	0.00478487	0.00249759	0.00377467			EC 2.1.1.245	Acetyl-CoA decarboxylase/synthase complex	1.49476	0.846106	1.16049
	EC 1.2.99.5	Formyl-Methanofuran Dehydrogenase	0.00223739	0	0.00223739			EC 1.2.99.5	Formyl-Methanofuran Dehydrogenase	0.736015	0	0.736015
	EC 2.3.1.101	Formylmethanofuran:H4MPT Formyltransferase						EC 2.3.1.101	Formylmethanofuran:H4MPT Formyltransferase
	EC 3.5.4.27	Methenyl-H4MPT Cyclohydrolase						EC 3.5.4.27	Methenyl-H4MPT Cyclohydrolase
	EC 1.12.98.2	Methylene-H4MPT Dehydrogenase	0.000536165	1.831e-06	0.000536165			EC 1.12.98.2	Methylene-H4MPT Dehydrogenase	0.157488	0.000530948	0.157488
	EC 1.5.98.2	Methylene-H4MPT Reductase						EC 1.5.98.2	Methylene-H4MPT Reductase
	EC 2.1.1.86	Methyl-H4MPT:CoM Methyltransferase	0.00106927	0.000719484	0.000881286			EC 2.1.1.86	Methyl-H4MPT:CoM Methyltransferase	0.325772	0.213216	0.270235
	EC 2.8.4.1	Methyl-CoM Reductase	0.00543153	0.00168725	0.00488399			EC 2.8.4.1	Methyl-CoM Reductase	1.6482	0.446215	1.57587
	1.8.98.1	Heterodisulfide reductase	0.00018908	0	0.00018908			1.8.98.1	Heterodisulfide reductase	0.0581586	0	0.0581586
		Ni,Fe-hydrogenase	0.00212056	0.000894797	0.00206182				Ni,Fe-hydrogenase	0.657831	0.297824	0.65361
	2.1.1.250	MG: Trimethylamine methyltransferase	0.000935855	0.000413385	0.00071526			2.1.1.250	MG: Trimethylamine methyltransferase	0.285587	0.126214	0.217386
	2.1.1.90	MG: Methanol--corrinoid protein						2.1.1.90	MG: Methanol--corrinoid protein
	2.1.1.248	MG: Monomethylamine methyltransferase	0.000348645	2.62255e-05	0.000348645			2.1.1.248	MG: Monomethylamine methyltransferase	0.108324	0.0022604	0.108324
	2.1.1.247	MG: Methylcobamide:CoM methyltransferase MtbA	0.000566752	0.000202756	0.000503332			2.1.1.247	MG: Methylcobamide:CoM methyltransferase MtbA	0.173706	0.0670716	0.149425
	2.1.1.246	MG: Methylcobamide:CoM methyltransferase MtaA	0.00083168	0.000692979	0.000466309			2.1.1.246	MG: Methylcobamide:CoM methyltransferase MtaA	0.256089	0.22399	0.139448
	2.1.1.249	MG: Dimethylamine methyltransferase MtbB	0.000472818	0.000281854	0.00036686			2.1.1.249	MG: Dimethylamine methyltransferase MtbB	0.141015	0.0798525	0.108221
	1.12.98.1	Coenzyme F420-reducing hydrogenasegeneric	0.000412043	0	0.000412043			1.12.98.1	Coenzyme F420-reducing hydrogenasegeneric	0.129812	0	0.129812
Week 77	EC 2.7.2.1	Acetate Kinase	0.00449677	0.000787572	0.00438764		Week 77	EC 2.7.2.1	Acetate Kinase
	EC 2.1.1.245	Acetyl-CoA decarboxylase/synthase complex						EC 2.1.1.245	Acetyl-CoA decarboxylase/synthase complex	1.53556	0.326712	1.62358
	EC 1.2.99.5	Formyl-Methanofuran Dehydrogenase	0.000869972	0.000230868	0.000855315			EC 1.2.99.5	Formyl-Methanofuran Dehydrogenase	0.299503	0.0998621	0.275343
	EC 2.3.1.101	Formylmethanofuran:H4MPT Formyltransferase						EC 2.3.1.101	Formylmethanofuran:H4MPT Formyltransferase
	EC 3.5.4.27	Methenyl-H4MPT Cyclohydrolase						EC 3.5.4.27	Methenyl-H4MPT Cyclohydrolase
	EC 1.12.98.2	Methylene-H4MPT Dehydrogenase						EC 1.12.98.2	Methylene-H4MPT Dehydrogenase
	EC 1.5.98.2	Methylene-H4MPT Reductase						EC 1.5.98.2	Methylene-H4MPT Reductase
	EC 2.1.1.86	Methyl-H4MPT:CoM Methyltransferase	0.00060627	0.000497645	0.000380441			EC 2.1.1.86	Methyl-H4MPT:CoM Methyltransferase	0.190845	0.132317	0.142051
	EC 2.8.4.1	Methyl-CoM Reductase	0.0080486	0.000987499	0.00771029			EC 2.8.4.1	Methyl-CoM Reductase	2.72019	0.314133	2.71243
	1.8.98.1	Heterodisulfide reductase						1.8.98.1	Heterodisulfide reductase
		Ni,Fe-hydrogenase	0.00139417	0.000537248	0.00132066				Ni,Fe-hydrogenase	0.473431	0.204117	0.400651
	2.1.1.250	MG: Trimethylamine methyltransferase	0.000246618	6.7304e-05	0.000267402			2.1.1.250	MG: Trimethylamine methyltransferase	0.0880859	0.0233298	0.0878771
	2.1.1.248	MG: Monomethylamine methyltransferase	0.000171816	0	0.000171816			2.1.1.248	MG: Monomethylamine methyltransferase	0.0633527	0	0.0633527
	2.1.1.247	MG: Methylcobamide:CoM methyltransferase MtbA	0.000798486	0	0.000798486			2.1.1.247	MG: Methylcobamide:CoM methyltransferase MtbA	0.225071	0	0.225071
	2.1.1.246	MG: Methylcobamide:CoM methyltransferase MtaA	0.000284184	7.62751e-05	0.000232129			2.1.1.246	MG: Methylcobamide:CoM methyltransferase MtaA	0.10061	0.0199715	0.087404
	2.1.1.249	MG: Dimethylamine methyltransferase MtbB	0.000200629	6.5315e-05	0.000168145			2.1.1.249	MG: Dimethylamine methyltransferase MtbB	0.0636327	0.0145699	0.0619991
Week 80	EC 2.7.2.1	Acetate Kinase	0.000456901	0.000224563	0.000386973		Week 80	EC 2.7.2.1	Acetate Kinase	0.117965	0.0597912	0.0972702
	EC 2.1.1.245	Acetyl-CoA decarboxylase/synthase complex	0.00432243	0.00122183	0.00410871			EC 2.1.1.245	Acetyl-CoA decarboxylase/synthase complex	1.11549	0.328115	1.06169
	EC 1.2.99.5	Formyl-Methanofuran Dehydrogenase	0.000908615	0.000466259	0.000678877			EC 1.2.99.5	Formyl-Methanofuran Dehydrogenase	0.235606	0.124912	0.176221
	EC 2.3.1.101	Formylmethanofuran:H4MPT Formyltransferase						EC 2.3.1.101	Formylmethanofuran:H4MPT Formyltransferase
	EC 3.5.4.27	Methenyl-H4MPT Cyclohydrolase						EC 3.5.4.27	Methenyl-H4MPT Cyclohydrolase
	EC 1.12.98.2	Methylene-H4MPT Dehydrogenase						EC 1.12.98.2	Methylene-H4MPT Dehydrogenase
	EC 1.5.98.2	Methylene-H4MPT Reductase						EC 1.5.98.2	Methylene-H4MPT Reductase
	EC 2.1.1.86	Methyl-H4MPT:CoM Methyltransferase	0.000612224	0.000295788	0.000542123			EC 2.1.1.86	Methyl-H4MPT:CoM Methyltransferase	0.158726	0.0792972	0.139195
	EC 2.8.4.1	Methyl-CoM Reductase	0.00688258	0.000811262	0.00654414			EC 2.8.4.1	Methyl-CoM Reductase	1.77056	0.207586	1.72366
	1.8.98.1	Heterodisulfide reductase						1.8.98.1	Heterodisulfide reductase
		Ni,Fe-hydrogenase	0.00285714	0.00132392	0.00270707				Ni,Fe-hydrogenase	0.741539	0.353605	0.701206
	2.1.1.250	MG: Trimethylamine methyltransferase	0.000189185	0	0.000189185			2.1.1.250	MG: Trimethylamine methyltransferase	0.0499586	0	0.0499586
	2.1.1.248	MG: Monomethylamine methyltransferase	0.000186849	0	0.000186849			2.1.1.248	MG: Monomethylamine methyltransferase	0.0475827	0	0.0475827
	2.1.1.247	MG: Methylcobamide:CoM methyltransferase MtbA	0.000407138	9.62386e-05	0.000440293			2.1.1.247	MG: Methylcobamide:CoM methyltransferase MtbA	0.10351	0.0230385	0.109009
	2.1.1.246	MG: Methylcobamide:CoM methyltransferase MtaA	0.000975976	0	0.000975976			2.1.1.246	MG: Methylcobamide:CoM methyltransferase MtaA	0.256639	0	0.256639
	2.1.1.249	MG: Dimethylamine methyltransferase MtbB	0.000548847	0.000183135	0.000548847			2.1.1.249	MG: Dimethylamine methyltransferase MtbB	0.142805	0.0496738	0.142805
Week 84	EC 2.7.2.1	Acetate Kinase					Week 84	EC 2.7.2.1	Acetate Kinase	1.23396	0.218517	1.19923
	EC 2.1.1.245	Acetyl-CoA decarboxylase/synthase complex	0.00569292	0.00342524	0.00421031			EC 2.1.1.245	Acetyl-CoA decarboxylase/synthase complex	0.51104	0.158319	0.521738
	EC 1.2.99.5	Formyl-Methanofuran Dehydrogenase	0.00172608	0.00100145	0.00182877			EC 1.2.99.5	Formyl-Methanofuran Dehydrogenase
	EC 2.3.1.101	Formylmethanofuran:H4MPT Formyltransferase						EC 2.3.1.101	Formylmethanofuran:H4MPT Formyltransferase
	EC 3.5.4.27	Methenyl-H4MPT Cyclohydrolase						EC 3.5.4.27	Methenyl-H4MPT Cyclohydrolase
	EC 1.12.98.2	Methylene-H4MPT Dehydrogenase						EC 1.12.98.2	Methylene-H4MPT Dehydrogenase
	EC 1.5.98.2	Methylene-H4MPT Reductase	0.000363787	0	0.000408815			EC 1.5.98.2	Methylene-H4MPT Reductase	0.115852	0.0430388	0.115852
	EC 2.1.1.86	Methyl-H4MPT:CoM Methyltransferase	0.00208118	0.00174986	0.000850322			EC 2.1.1.86	Methyl-H4MPT:CoM Methyltransferase	0.366182	0.275681	0.25895
	EC 2.8.4.1	Methyl-CoM Reductase	0.00587886	0.00918827	0.00725787			EC 2.8.4.1	Methyl-CoM Reductase	2.11507	0.528083	2.16646
	1.8.98.1	Heterodisulfide reductase	0.000755437	0	0.000476774			1.8.98.1	Heterodisulfide reductase	0.148341	0	0.148341
		Ni,Fe-hydrogenase	0.00088346	0.000558068	0.0021935				Ni,Fe-hydrogenase	0.688995	0.332252	0.66474
	2.1.1.250	MG: Trimethylamine methyltransferase	0.000351204	0.000296537	0.000154488			2.1.1.250	MG: Trimethylamine methyltransferase	0.0975949	0.0793819	0.0462817
	2.1.1.248	MG: Monomethylamine methyltransferase	0.000241793	0.000125081	0.000167643			2.1.1.248	MG: Monomethylamine methyltransferase	0.0679749	0.0326692	0.0502227
	2.1.1.247	MG: Methylcobamide:CoM methyltransferase MtbA	0.00069765	0.000278149	0.000604201			2.1.1.247	MG: Methylcobamide:CoM methyltransferase MtbA	0.199941	0.0696822	0.178293
	2.1.1.246	MG: Methylcobamide:CoM methyltransferase MtaA	0.000291744	7.30525e-05	0.000291744			2.1.1.246	MG: Methylcobamide:CoM methyltransferase MtaA	0.086099	0.0180566	0.086099
	2.1.1.249	MG: Dimethylamine methyltransferase MtbB	0.000382525	0.000186397	0.000368528			2.1.1.249	MG: Dimethylamine methyltransferase MtbB	0.11227	0.0560719	0.106712

## Sheet: R2 Methanomicrobiaceae
	Raw							Normalized
Sample	EC	Enzyme	Mean	STD	Median		Sample	EC	Enzyme	Mean	STD	Median
Week 65	EC 1.2.99.5	Formyl-Methanofuran Dehydrogenase	0.00202383	0.00151906	0.00127303		Week 65	EC 1.2.99.5	Formyl-Methanofuran Dehydrogenase	0.556999	0.425175	0.37043
	EC 2.3.1.101	Formylmethanofuran:H4MPT Formyltransferase	0.00142937	0.00122034	0.00103031			EC 2.3.1.101	Formylmethanofuran:H4MPT Formyltransferase	0.371822	0.304995	0.252826
	EC 3.5.4.27	Methenyl-H4MPT Cyclohydrolase	0.00175574	0.000407395	0.00181309			EC 3.5.4.27	Methenyl-H4MPT Cyclohydrolase
	EC 1.12.98.2	Methylene-H4MPT Dehydrogenase	0.00104932	0.000412325	0.00101096			EC 1.12.98.2	Methylene-H4MPT Dehydrogenase	0.267433	0.0967603	0.269082
	EC 1.5.98.2	Methylene-H4MPT Reductase	0.00546461	0.00110193	0.00506214			EC 1.5.98.2	Methylene-H4MPT Reductase	1.44747	0.246865	1.44775
	EC 2.1.1.86	Methyl-H4MPT:CoM Methyltransferase	0.00320481	0.00147793	0.00342621			EC 2.1.1.86	Methyl-H4MPT:CoM Methyltransferase	0.86268	0.421606	0.852186
	EC 2.8.4.1	Methyl-CoM Reductase	0.0104133	0.0022166	0.0105984			EC 2.8.4.1	Methyl-CoM Reductase	2.77491	0.626604	2.88758
	1.8.98.1	Heterodisulfide reductase	0.0035142	0.00156457	0.00342874			1.8.98.1	Heterodisulfide reductase	0.923579	0.376098	0.957044
	1.12.98.1	Coenzyme F420-reducing hydrogenasegeneric	0.00299061	0.000797311	0.00302454			1.12.98.1	Coenzyme F420-reducing hydrogenasegeneric	0.800617	0.228423	0.777949
Week 77	EC 1.2.99.5	Formyl-Methanofuran Dehydrogenase	0.00175717	0.000879885	0.00135361		Week 77	EC 1.2.99.5	Formyl-Methanofuran Dehydrogenase	0.46981	0.253215	0.360261
	EC 2.3.1.101	Formylmethanofuran:H4MPT Formyltransferase						EC 2.3.1.101	Formylmethanofuran:H4MPT Formyltransferase
	EC 3.5.4.27	Methenyl-H4MPT Cyclohydrolase	0.000979688	0.000325388	0.00102534			EC 3.5.4.27	Methenyl-H4MPT Cyclohydrolase	0.251983	0.0805899	0.236334
	EC 1.12.98.2	Methylene-H4MPT Dehydrogenase	0.00290056	0.00177186	0.00258853			EC 1.12.98.2	Methylene-H4MPT Dehydrogenase	0.76347	0.50913	0.59651
	EC 1.5.98.2	Methylene-H4MPT Reductase	0.00359609	0.00141939	0.00289495			EC 1.5.98.2	Methylene-H4MPT Reductase	0.91793	0.353437	0.765283
	EC 2.1.1.86	Methyl-H4MPT:CoM Methyltransferase	0.00316118	0.000848635	0.00316998			EC 2.1.1.86	Methyl-H4MPT:CoM Methyltransferase	0.821323	0.2375	0.851236
	EC 2.8.4.1	Methyl-CoM Reductase	0.00217448	0.00120795	0.00156567			EC 2.8.4.1	Methyl-CoM Reductase	0.56346	0.316364	0.40169
	1.8.98.1	Heterodisulfide reductase	0.00250443	0.00180837	0.00187768			1.8.98.1	Heterodisulfide reductase	0.654487	0.504748	0.432701
	1.12.98.1	Coenzyme F420-reducing hydrogenasegeneric	0.00205712	0.000742172	0.00204855			1.12.98.1	Coenzyme F420-reducing hydrogenasegeneric	0.519283	0.177693	0.573529
Week 80	EC 1.2.99.5	Formyl-Methanofuran Dehydrogenase	0.00117753	0.00067909	0.00099356		Week 80	EC 1.2.99.5	Formyl-Methanofuran Dehydrogenase	0.260199	0.153616	0.224049
	EC 2.3.1.101	Formylmethanofuran:H4MPT Formyltransferase	0.000927534	0.000562768	0.00057711			EC 2.3.1.101	Formylmethanofuran:H4MPT Formyltransferase	0.206513	0.126675	0.133909
	EC 3.5.4.27	Methenyl-H4MPT Cyclohydrolase	0.00164504	0.00102277	0.00144623			EC 3.5.4.27	Methenyl-H4MPT Cyclohydrolase	0.356189	0.215212	0.319285
	EC 1.12.98.2	Methylene-H4MPT Dehydrogenase	0.000534098	0.000132956	0.000534098			EC 1.12.98.2	Methylene-H4MPT Dehydrogenase	0.11099	0.0245905	0.11099
	EC 1.5.98.2	Methylene-H4MPT Reductase	0.00408411	0.00156009	0.00409282			EC 1.5.98.2	Methylene-H4MPT Reductase	0.894309	0.334553	0.896277
	EC 2.1.1.86	Methyl-H4MPT:CoM Methyltransferase	0.0030339	0.000781482	0.00276948			EC 2.1.1.86	Methyl-H4MPT:CoM Methyltransferase	0.666103	0.167801	0.604361
	EC 2.8.4.1	Methyl-CoM Reductase	0.0135671	0.00524684	0.0137508			EC 2.8.4.1	Methyl-CoM Reductase	2.98556	1.20199	2.92234
	1.8.98.1	Heterodisulfide reductase	0.00272613	0.000973743	0.00258887			1.8.98.1	Heterodisulfide reductase	0.606573	0.23442	0.578458
	1.12.98.1	Coenzyme F420 hydrogenase	0.00271532	0.00108859	0.00275285			1.12.98.1	Coenzyme F420 hydrogenase	0.589501	0.220517	0.594851
Week 84	EC 1.2.99.5	Formyl-Methanofuran Dehydrogenase	0.00111613	0.000465811	0.00127087		Week 84	EC 1.2.99.5	Formyl-Methanofuran Dehydrogenase	0.262269	0.116966	0.280928
	EC 2.3.1.101	Formylmethanofuran:H4MPT Formyltransferase	0.000458217	9.4038e-05	0.000458217			EC 2.3.1.101	Formylmethanofuran:H4MPT Formyltransferase	0.106879	0.0205048	0.106879
	EC 3.5.4.27	Methenyl-H4MPT Cyclohydrolase	0.00135723	0.00067656	0.0013158			EC 3.5.4.27	Methenyl-H4MPT Cyclohydrolase	0.346617	0.128713	0.330907
	EC 1.12.98.2	Methylene-H4MPT Dehydrogenase	0.000618209	0.00014284	0.000595647			EC 1.12.98.2	Methylene-H4MPT Dehydrogenase	0.144578	0.0378166	0.137392
	EC 1.5.98.2	Methylene-H4MPT Reductase	0.00534535	0.00288501	0.00473281			EC 1.5.98.2	Methylene-H4MPT Reductase	1.21798	0.540263	1.14336
	EC 2.1.1.86	Methyl-H4MPT:CoM Methyltransferase	0.00526	0.00250428	0.0043136			EC 2.1.1.86	Methyl-H4MPT:CoM Methyltransferase	1.25073	0.589416	1.18601
	EC 2.8.4.1	Methyl-CoM Reductase	0.0150383	0.00551417	0.0146515			EC 2.8.4.1	Methyl-CoM Reductase	3.51256	1.23369	3.14305
	1.8.98.1	Heterodisulfide reductase	0.0010892	0.000421702	0.000925634			1.8.98.1	Heterodisulfide reductase	0.264708	0.104329	0.268436
	1.12.98.1	Coenzyme F420-reducing hydrogenasegeneric	0.00331519	0.00160146	0.0028699			1.12.98.1	Coenzyme F420-reducing hydrogenasegeneric	0.781055	0.334858	0.680666

## Sheet: R2 Methanosarcinaceae
	Raw							Normalized
Sample	EC	Enzyme	Mean	STD	Median		Sample	EC	Enzyme	Mean	STD	Median
Week 65	EC 2.7.2.1	Acetate Kinase	0.00105456	0.00055553	0.000856017		Week 65	EC 2.7.2.1	Acetate Kinase	0.280491	0.150778	0.236371
	EC 2.1.1.245	Acetyl-CoA decarboxylase/synthase complex	0.00479912	0.00236711	0.0044423			EC 2.1.1.245	Acetyl-CoA decarboxylase/synthase complex	1.31329	0.684959	1.14096
	EC 1.2.99.5	Formyl-Methanofuran Dehydrogenase	0.00181361	0.00059688	0.0014765			EC 1.2.99.5	Formyl-Methanofuran Dehydrogenase	0.523176	0.13918	0.457225
	EC 2.3.1.101	Formylmethanofuran:H4MPT Formyltransferase						EC 2.3.1.101	Formylmethanofuran:H4MPT Formyltransferase
	EC 3.5.4.27	Methenyl-H4MPT Cyclohydrolase						EC 3.5.4.27	Methenyl-H4MPT Cyclohydrolase
	EC 1.12.98.2	Methylene-H4MPT Dehydrogenase						EC 1.12.98.2	Methylene-H4MPT Dehydrogenase
	EC 1.5.98.2	Methylene-H4MPT Reductase	0.000564522	0.000123133	0.00051778			EC 1.5.98.2	Methylene-H4MPT Reductase	0.144747	0.0287205	0.139714
	EC 2.1.1.86	Methyl-H4MPT:CoM Methyltransferase	0.001192	0.000554266	0.00102551			EC 2.1.1.86	Methyl-H4MPT:CoM Methyltransferase	0.320021	0.151029	0.28742
	EC 2.8.4.1	Methyl-CoM Reductase	0.00491015	0.00243199	0.00400217			EC 2.8.4.1	Methyl-CoM Reductase	1.2999	0.640847	1.09085
	1.8.98.1	Heterodisulfide reductase	0.00018633	0	0.00018633			1.8.98.1	Heterodisulfide reductase	0.0475049	0	0.0475049
		Ni,Fe-hydrogenase	0.00205391	0.000951863	0.00173821				Ni,Fe-hydrogenase	0.542096	0.244383	0.472132
	2.1.1.250	MG: Trimethylamine methyltransferase	0.000785037	0.000313165	0.000698301			2.1.1.250	MG: Trimethylamine methyltransferase	0.211912	0.0848585	0.194434
	2.1.1.90	MG: Methanol--corrinoid protein						2.1.1.90	MG: Methanol--corrinoid protein
	2.1.1.248	MG: Monomethylamine methyltransferase	0.000706851	0	0.000706851			2.1.1.248	MG: Monomethylamine methyltransferase	0.213109	0	0.213109
	2.1.1.247	MG: Methylcobamide:CoM methyltransferase MtbA	0.000716451	0.000131527	0.000758588			2.1.1.247	MG: Methylcobamide:CoM methyltransferase MtbA	0.18602	0.0371433	0.208044
	2.1.1.246	MG: Methylcobamide:CoM methyltransferase MtaA	0.000406011	0	0.000406011			2.1.1.246	MG: Methylcobamide:CoM methyltransferase MtaA	0.108054	0	0.108054
	2.1.1.249	MG: Dimethylamine methyltransferase MtbB	0.000827072	0.000300418	0.000900082			2.1.1.249	MG: Dimethylamine methyltransferase MtbB	0.220508	0.0863078	0.223775
	1.12.98.1	Coenzyme F420-reducing hydrogenasegeneric	0.000471494	0.000170647	0.000379778			1.12.98.1	Coenzyme F420-reducing hydrogenasegeneric	0.120375	0.0334901	0.1145
Week 77	EC 2.7.2.1	Acetate Kinase	0.000755215	0.000441848	0.00045275		Week 77	EC 2.7.2.1	Acetate Kinase	0.197713	0.124912	0.117511
	EC 2.1.1.245	Acetyl-CoA decarboxylase/synthase complex	0.00197118	0.000976443	0.00176843			EC 2.1.1.245	Acetyl-CoA decarboxylase/synthase complex	0.498204	0.24577	0.458995
	EC 1.2.99.5	Formyl-Methanofuran Dehydrogenase	0.00128041	0.000338865	0.00124023			EC 1.2.99.5	Formyl-Methanofuran Dehydrogenase	0.342101	0.102098	0.335642
	EC 2.3.1.101	Formylmethanofuran:H4MPT Formyltransferase						EC 2.3.1.101	Formylmethanofuran:H4MPT Formyltransferase
	EC 3.5.4.27	Methenyl-H4MPT Cyclohydrolase						EC 3.5.4.27	Methenyl-H4MPT Cyclohydrolase
	EC 1.12.98.2	Methylene-H4MPT Dehydrogenase	0.00130405	0	0.00130405			EC 1.12.98.2	Methylene-H4MPT Dehydrogenase	0.289508	0	0.289508
	EC 1.5.98.2	Methylene-H4MPT Reductase	0.000440914	8.16223e-05	0.000401297			EC 1.5.98.2	Methylene-H4MPT Reductase	0.107162	0.0146979	0.110705
	EC 2.1.1.86	Methyl-H4MPT:CoM Methyltransferase	0.000946379	0.000464464	0.000916109			EC 2.1.1.86	Methyl-H4MPT:CoM Methyltransferase	0.228803	0.109749	0.216549
	EC 2.8.4.1	Methyl-CoM Reductase	0.00380164	0.00249904	0.00313157			EC 2.8.4.1	Methyl-CoM Reductase	0.961826	0.599318	0.8113
	1.8.98.1	Heterodisulfide reductase						1.8.98.1	Heterodisulfide reductase
		Ni,Fe-hydrogenase	0.0014237	0.000636127	0.00133425				Ni,Fe-hydrogenase	0.371635	0.178832	0.330163
	2.1.1.250	MG: Trimethylamine methyltransferase	0.00080528	0.000393025	0.00073205			2.1.1.250	MG: Trimethylamine methyltransferase	0.206536	0.114562	0.16252
	2.1.1.248	MG: Monomethylamine methyltransferase	0.000799158	0	0.000799158			2.1.1.248	MG: Monomethylamine methyltransferase	0.213461	0	0.213461
	2.1.1.247	MG: Methylcobamide:CoM methyltransferase MtbA	0.00063532	0.00030743	0.00053662			2.1.1.247	MG: Methylcobamide:CoM methyltransferase MtbA	0.157817	0.0704501	0.141341
	2.1.1.246	MG: Methylcobamide:CoM methyltransferase MtaA	0.00072787	0.000374092	0.000526273			2.1.1.246	MG: Methylcobamide:CoM methyltransferase MtaA	0.1824	0.102494	0.136594
	2.1.1.249	MG: Dimethylamine methyltransferase MtbB	0.000725544	0.000260226	0.00078941			2.1.1.249	MG: Dimethylamine methyltransferase MtbB	0.180727	0.0632539	0.204891
Week 80	EC 2.7.2.1	Acetate Kinase	0.00063153	0.000317061	0.000431418		Week 80	EC 2.7.2.1	Acetate Kinase	0.122876	0.073051	0.099014
	EC 2.1.1.245	Acetyl-CoA decarboxylase/synthase complex	0.00639026	0.00289406	0.00550605			EC 2.1.1.245	Acetyl-CoA decarboxylase/synthase complex	1.38275	0.575204	1.20156
	EC 1.2.99.5	Formyl-Methanofuran Dehydrogenase	0.00125999	0.000692873	0.000858768			EC 1.2.99.5	Formyl-Methanofuran Dehydrogenase	0.277071	0.143921	0.193565
	EC 2.3.1.101	Formylmethanofuran:H4MPT Formyltransferase						EC 2.3.1.101	Formylmethanofuran:H4MPT Formyltransferase
	EC 3.5.4.27	Methenyl-H4MPT Cyclohydrolase						EC 3.5.4.27	Methenyl-H4MPT Cyclohydrolase
	EC 1.12.98.2	Methylene-H4MPT Dehydrogenase						EC 1.12.98.2	Methylene-H4MPT Dehydrogenase
	EC 1.5.98.2	Methylene-H4MPT Reductase	0.000585659	0.000241388	0.000525502			EC 1.5.98.2	Methylene-H4MPT Reductase	0.128862	0.0534559	0.107396
	EC 2.1.1.86	Methyl-H4MPT:CoM Methyltransferase	0.0013119	0.000677117	0.00136561			EC 2.1.1.86	Methyl-H4MPT:CoM Methyltransferase	0.285825	0.141298	0.291747
	EC 2.8.4.1	Methyl-CoM Reductase	0.0127535	0.00629732	0.0141471			EC 2.8.4.1	Methyl-CoM Reductase	2.79709	1.39378	3.0227
	1.8.98.1	Heterodisulfide reductase	0.000704598	5.145e-07	0.000704598			1.8.98.1	Heterodisulfide reductase	0.153696	0.00182576	0.153696
		Ni,Fe-hydrogenase	0.00109859	0.000502433	0.00109885				Ni,Fe-hydrogenase	0.237454	0.106249	0.236674
	2.1.1.250	MG: Trimethylamine methyltransferase	0.000656973	0.000261221	0.000697295			2.1.1.250	MG: Trimethylamine methyltransferase	0.14303	0.0581849	0.141755
	2.1.1.248	MG: Monomethylamine methyltransferase	0.000373471	0	0.000373471			2.1.1.248	MG: Monomethylamine methyltransferase	0.0823806	0	0.0823806
	2.1.1.247	MG: Methylcobamide:CoM methyltransferase MtbA	0.000587569	0.000188519	0.000519229			2.1.1.247	MG: Methylcobamide:CoM methyltransferase MtbA	0.127898	0.0385584	0.113184
	2.1.1.246	MG: Methylcobamide:CoM methyltransferase MtaA	0.000576638	0.000222051	0.000514674			2.1.1.246	MG: Methylcobamide:CoM methyltransferase MtaA	0.125495	0.0472436	0.111045
	2.1.1.249	MG: Dimethylamine methyltransferase MtbB	0.000774418	0.000340876	0.000695767			2.1.1.249	MG: Dimethylamine methyltransferase MtbB	0.168015	0.0728409	0.150262
Week 84	EC 2.7.2.1	Acetate Kinase	0.000617349	0.000291295	0.000594976		Week 84	EC 2.7.2.1	Acetate Kinase	0.146559	0.074921	0.133989
	EC 2.1.1.245	Acetyl-CoA decarboxylase/synthase complex	0.00569292	0.00342524	0.00484528			EC 2.1.1.245	Acetyl-CoA decarboxylase/synthase complex	1.32569	0.703011	1.10139
	EC 1.2.99.5	Formyl-Methanofuran Dehydrogenase	0.00172608	0.00100145	0.00135339			EC 1.2.99.5	Formyl-Methanofuran Dehydrogenase	0.391402	0.196656	0.332669
	EC 2.3.1.101	Formylmethanofuran:H4MPT Formyltransferase						EC 2.3.1.101	Formylmethanofuran:H4MPT Formyltransferase
	EC 3.5.4.27	Methenyl-H4MPT Cyclohydrolase						EC 3.5.4.27	Methenyl-H4MPT Cyclohydrolase
	EC 1.12.98.2	Methylene-H4MPT Dehydrogenase						EC 1.12.98.2	Methylene-H4MPT Dehydrogenase
	EC 1.5.98.2	Methylene-H4MPT Reductase	0.000363787	0	0.000363787			EC 1.5.98.2	Methylene-H4MPT Reductase	0.0884189	0	0.0884189
	EC 2.1.1.86	Methyl-H4MPT:CoM Methyltransferase	0.00208118	0.00174986	0.00148629			EC 2.1.1.86	Methyl-H4MPT:CoM Methyltransferase	0.467752	0.34134	0.374355
	EC 2.8.4.1	Methyl-CoM Reductase	0.00587886	0.00918827	0.0028374			EC 2.8.4.1	Methyl-CoM Reductase	1.27211	1.80085	0.682324
	1.8.98.1	Heterodisulfide reductase	0.000755437	0	0.000755437			1.8.98.1	Heterodisulfide reductase	0.191321	0	0.191321
		Ni,Fe-hydrogenase	0.00088346	0.000558068	0.000937204				Ni,Fe-hydrogenase	0.245034	0.142885	0.199871
	2.1.1.250	MG: Trimethylamine methyltransferase	0.000420295	6.0843e-05	0.000420295			2.1.1.250	MG: Trimethylamine methyltransferase	0.102648	0.0142932	0.102648
	2.1.1.248	MG: Monomethylamine methyltransferase	0.000448906	0	0.000448906			2.1.1.248	MG: Monomethylamine methyltransferase	0.106469	0	0.106469
	2.1.1.247	MG: Methylcobamide:CoM methyltransferase MtbA	0.000448413	0.000108105	0.000437879			2.1.1.247	MG: Methylcobamide:CoM methyltransferase MtbA	0.115062	0.0319176	0.110199
	2.1.1.246	MG: Methylcobamide:CoM methyltransferase MtaA	0.000342037	1.47207e-05	0.000348896			2.1.1.246	MG: Methylcobamide:CoM methyltransferase MtaA	0.0837126	0.00568383	0.0847996
	2.1.1.249	MG: Dimethylamine methyltransferase MtbB	0.000748678	0.000448835	0.000708876			2.1.1.249	MG: Dimethylamine methyltransferase MtbB	0.177845	0.1125	0.165806
